# Supplementary material for: Benchmarking of long-read correction methods
Source: PubMed Central journal article supplement (PMC7671305; doi:10.1093/nargab/lqaa037), 2020-05-25
Supplement: lqaa037_supplemental_file.pdf [file lqaa037_supplemental_file.pdf]

# Benchmarking of long-read correction methods

Juliane C. Dohm, Philipp Peters, Nancy Stralis-Pavese, Heinz Himmelbauer

## Supplementary Figures

**Supplementary Figure S1:** Zoomed comparison of occurrences of six-mers (a), seven-mers (b), eight-mers (c) in the reference genomes and the raw read sets of ONT (left) and PacBio (right). The diagonal blue line stands for perfect representation. The two red lines show the 3-fold standard deviation.

a)

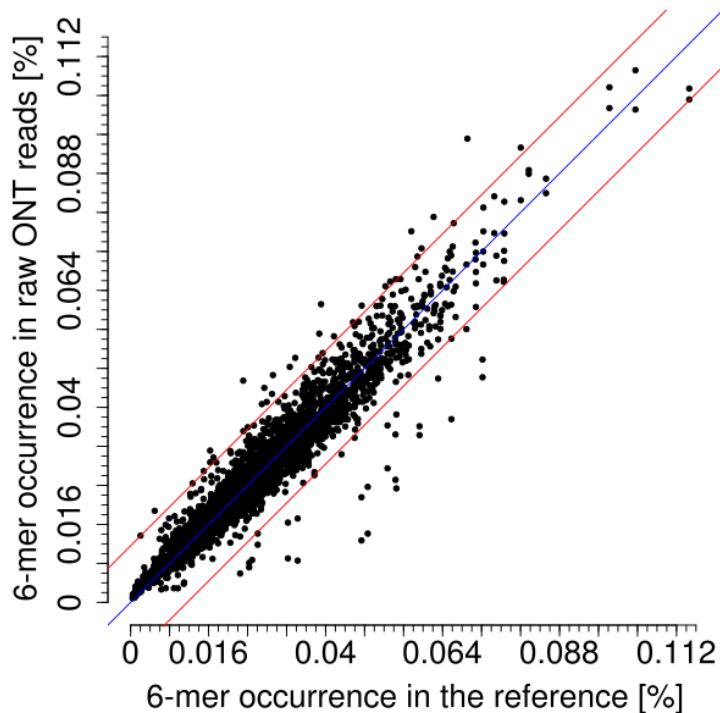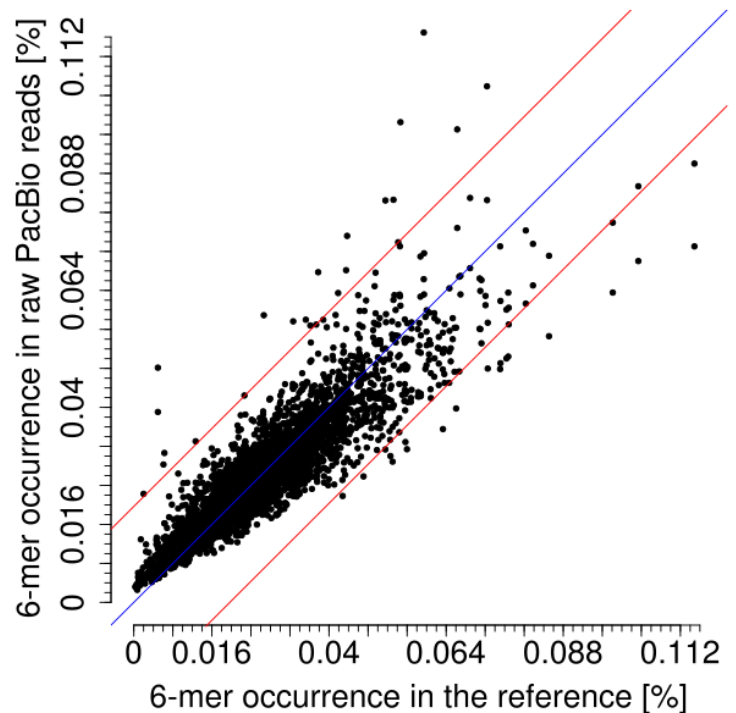

b)

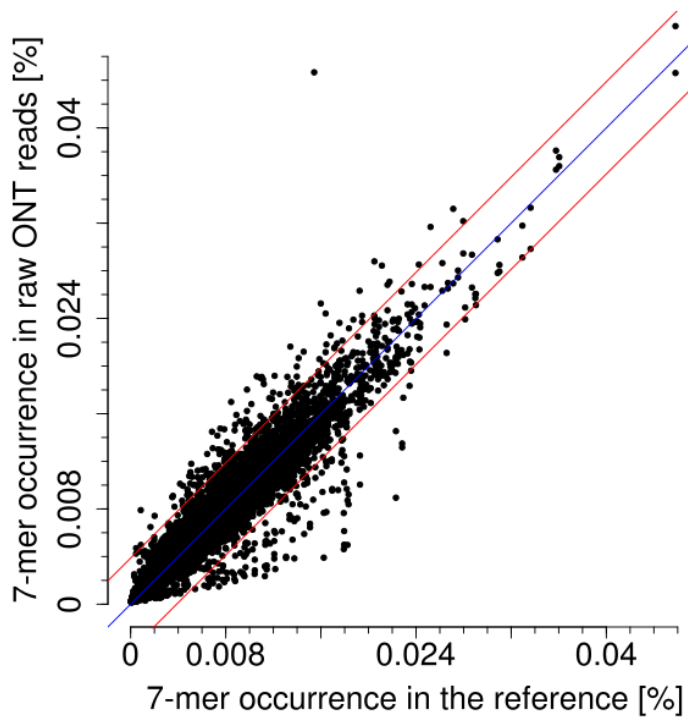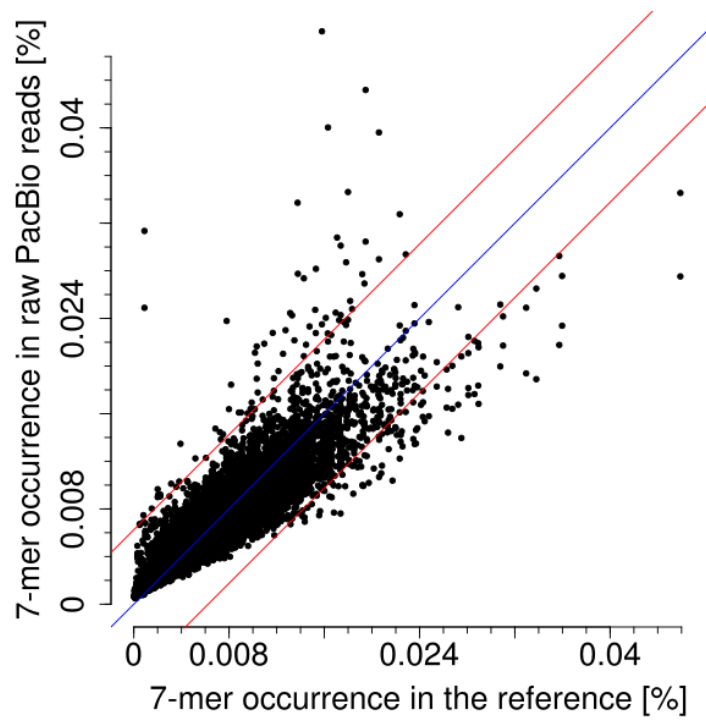

c)

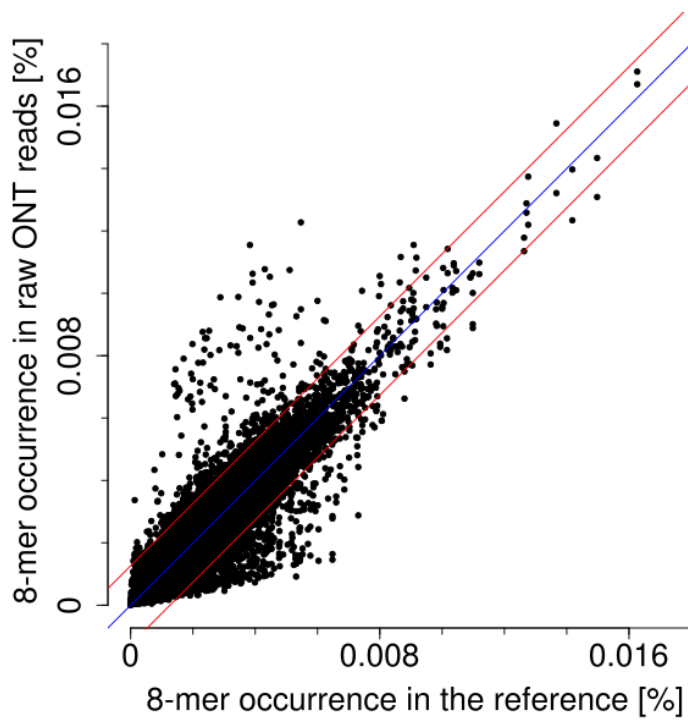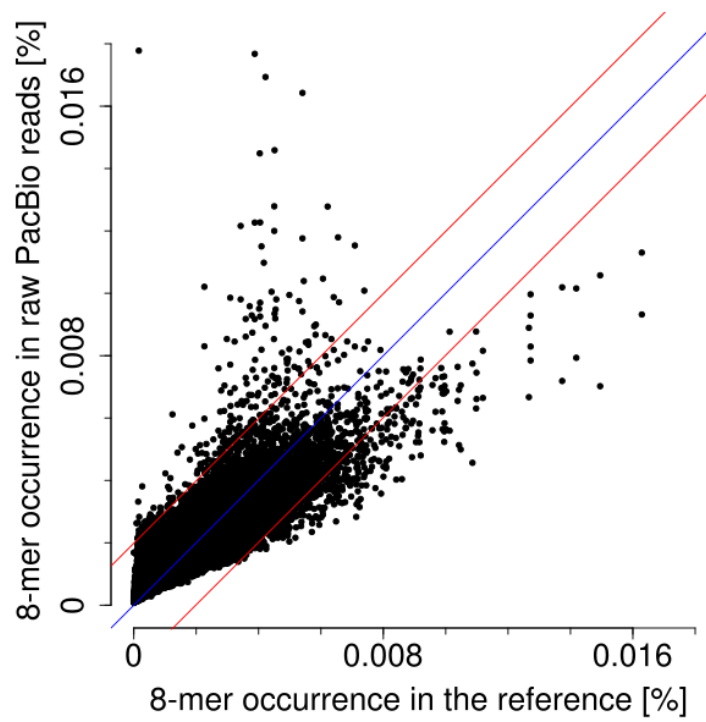

**Supplementary Figure S2:** Frequencies of six-mers in raw reads and patched reads of ONT (left) and PacBio (right) data. Blue line: perfect representation, red lines: 3-fold standard deviation. The six-mers furthest away from the diagonal represent the homopolymers.

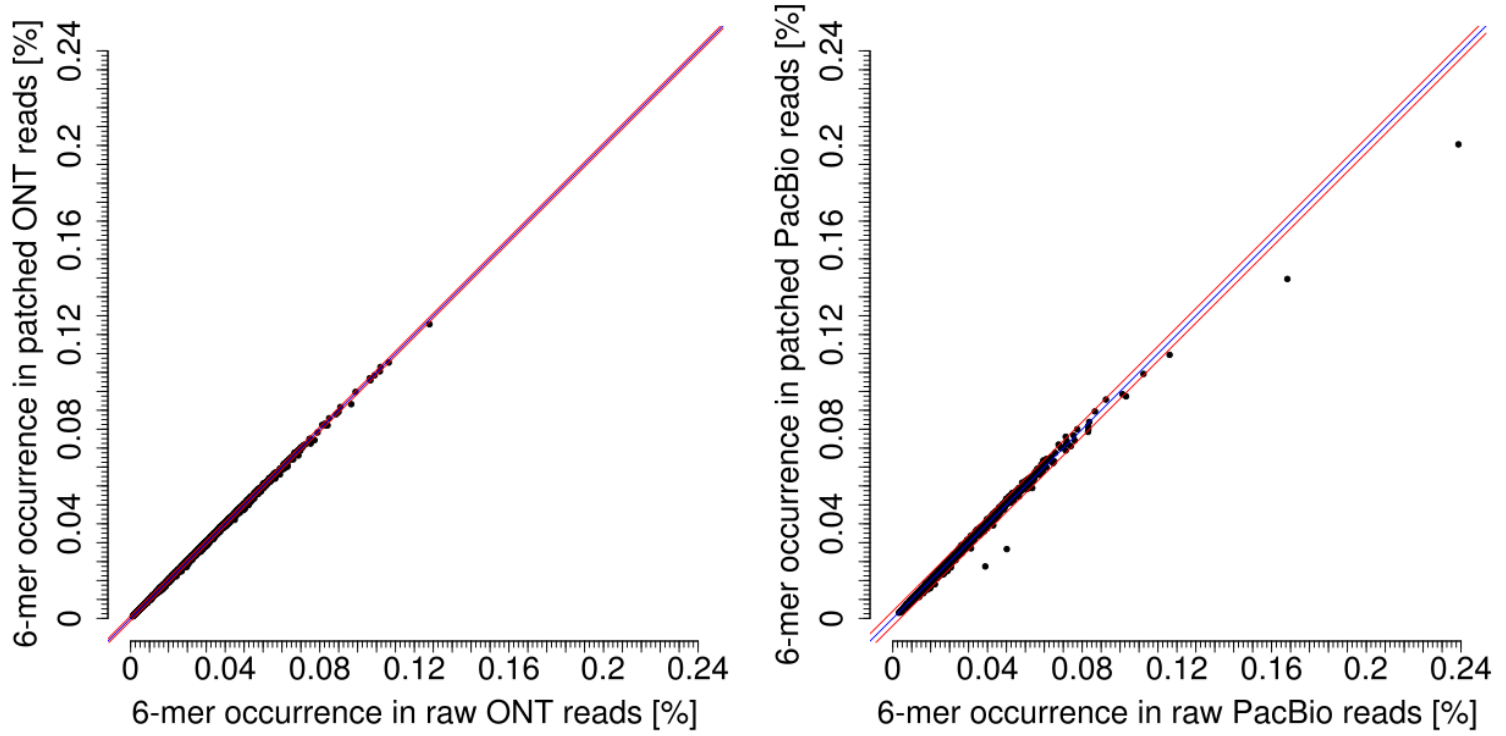

## Supplementary Table

**Supplementary Table S1:** The 30 most over- and underrepresented six-mers in the raw read datasets compared to the reference.

|                        | ONT    |                    | PacBio |                    |                         | ONT    |                    | PacBio |                    |
|------------------------|--------|--------------------|--------|--------------------|-------------------------|--------|--------------------|--------|--------------------|
|                        | 6mer   | difference in rate | 6mer   | difference in rate |                         | 6mer   | difference in rate | 6mer   | difference in rate |
| <b>overrepresented</b> | TTTTTT | 0.0573             | TTTTTT | 0.1699             | <b>underrepresented</b> | GCCTGG | -0.0347            | CGCCAG | -0.0418            |
|                        | AAAAAA | 0.0260             | AAAAAA | 0.0977             |                         | CCTGGC | -0.0345            | CCAGCG | -0.0346            |
|                        | GCACGG | 0.0224             | GTTTTT | 0.0575             |                         | CAAAAA | -0.0311            | GCCAGC | -0.0334            |
|                        | CGGGCG | 0.0221             | TTTTTG | 0.0439             |                         | AAAAAG | -0.0292            | CCAGCA | -0.0305            |
|                        | CGGCGG | 0.0186             | GGGGGG | 0.0432             |                         | AAAAAT | -0.0282            | CACCAG | -0.0278            |
|                        | CACGGC | 0.0174             | CCCCCC | 0.0341             |                         | GAAAAA | -0.0260            | CCGCCA | -0.0272            |
|                        | CAGCGG | 0.0169             | TTTTTC | 0.0335             |                         | CCAGGC | -0.0258            | TGCCAG | -0.0263            |
|                        | GGGCGG | 0.0166             | TTTTGG | 0.0323             |                         | ACCTGG | -0.0257            | TCGCCA | -0.0263            |
|                        | CGGTGG | 0.0164             | TGTTTT | 0.0315             |                         | TAAAAA | -0.0252            | ACCAGC | -0.0263            |
|                        | CCGGGC | 0.0164             | GGTTTT | 0.0309             |                         | GCCAGG | -0.0250            | ATCGCC | -0.0261            |
|                        | GGCGGG | 0.0157             | ATTTTT | 0.0308             |                         | AAAAAC | -0.0250            | CTGGCG | -0.0248            |
|                        | CACGGG | 0.0148             | TTTTAA | 0.0300             |                         | CCTGGT | -0.0233            | TCCAGC | -0.0246            |
|                        | GGGGGG | 0.0138             | TTTTTA | 0.0294             |                         | GTTTTT | -0.0231            | ATCACC | -0.0246            |
|                        | TCCCGC | 0.0138             | TTGTTT | 0.0250             |                         | TTTTTC | -0.0224            | CCACCA | -0.0242            |
|                        | CCACGG | 0.0138             | AATTTT | 0.0247             |                         | CTTTTT | -0.0199            | ACCGCC | -0.0228            |
|                        | GTTTTC | 0.0135             | GCCGGC | 0.0244             |                         | CGCCTG | -0.0172            | TCACCA | -0.0226            |
|                        | GCGGCG | 0.0133             | AGTTTT | 0.0227             |                         | CCTGGG | -0.0171            | CACCAC | -0.0212            |
|                        | CACGGT | 0.0132             | CGGCCG | 0.0222             |                         | CCAGGT | -0.0171            | ACCACC | -0.0210            |
|                        | GCAGCG | 0.0130             | GTTTTG | 0.0216             |                         | CCCTGG | -0.0166            | CGCTGG | -0.0202            |
|                        | GTTTTG | 0.0129             | TTTAAA | 0.0206             |                         | TTTTTA | -0.0164            | TCACCG | -0.0202            |
|                        | GGTGGG | 0.0127             | TTTGGG | 0.0204             |                         | CCTGGA | -0.0162            | CAGCAG | -0.0198            |
|                        | GCGGTG | 0.0126             | GGCGCC | 0.0203             |                         | CCCAGG | -0.0162            | GCCAGT | -0.0196            |
|                        | GCGCGC | 0.0126             | GGGTTT | 0.0198             |                         | TTTTTG | -0.0160            | TTACCG | -0.0195            |
|                        | CGGGGC | 0.0124             | CGTTTT | 0.0197             |                         | ACCAGG | -0.0159            | GCCGCC | -0.0193            |
|                        | GCGTTT | 0.0121             | TTTGCC | 0.0196             |                         | TCCTGG | -0.0143            | CACCGC | -0.0192            |
|                        | TGGGTG | 0.0120             | TTTTGT | 0.0192             |                         | AACCTG | -0.0129            | CGCCGC | -0.0190            |
|                        | CACGGA | 0.0119             | CTTTTT | 0.0185             |                         | GCAAAA | -0.0129            | TCATCA | -0.0190            |
|                        | TCACGG | 0.0119             | TTTTCC | 0.0181             |                         | TGCCTG | -0.0122            | CGCCAT | -0.0187            |
|                        | CGTTTT | 0.0119             | TTTTCG | 0.0176             |                         | CCAGGA | -0.0120            | TTCACC | -0.0186            |
|                        | CGCGCG | 0.0118             | GCTTGG | 0.0173             |                         | ATTTTT | -0.0117            | TTCCAG | -0.0184            |
